# Supplementary material for: The contribution of complementary hydrogen bonding to supramolecular structureElectronic supplementary information (ESI) available: 1H NMR spectra. See http://www.rsc.org/suppdata/cc/b1/b108922f/
Source: Royal Society of Chemistry journal article supplement (doi:10.1039/b108922f), 2002-04-03
Supplement: b108922f(b).pdf [file b108922f%28b%29.pdf]

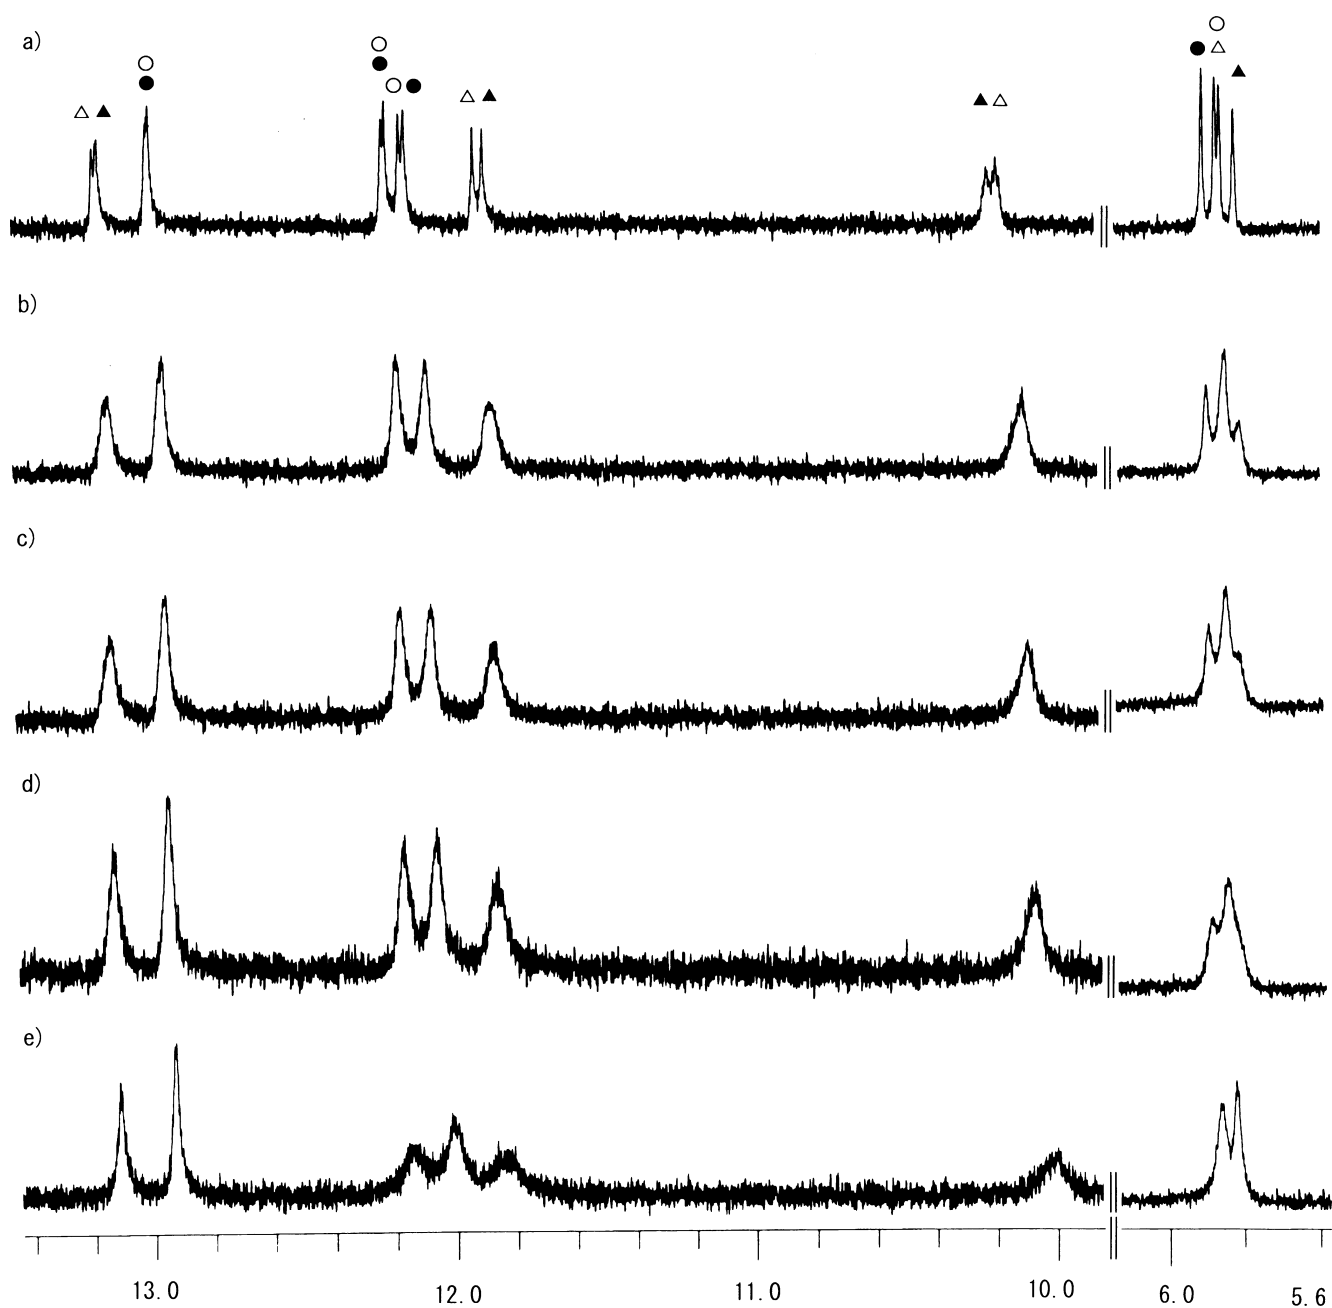

$^1\text{H}$  NMR spectra of a mixture of **2** (4.4 mM) and UPBu (3.3 mM) recorded at 500 MHz in  $\text{CDCl}_3\text{-CD}_3\text{CN}$  (4 : 1). a) 268K, b) 298K, c) 303K, d) 308K, e) 323K.

●; **2-2**, ○; **2 of 2-UPBu**, ▲; UPBu-UPBu, △; UPBu of **2-UPBu**
